# Supplementary material
Source: PubMed Central journal article supplement (PMC6119155)
Supplement: 2018.188094.ALDOSS_SUPPL.pdf [file 2018.188094.ALDOSS_SUPPL.pdf]

**Efficacy of the combination of venetoclax and hypomethylating agents in relapsed/refractory acute myeloid leukemia**

---

*Ibrahim Aldoss,<sup>1</sup> Dongyun Yang,<sup>2</sup> Ahmed Aribi,<sup>1</sup> Haris Ali,<sup>1</sup> Karamjeet Sandhu,<sup>1</sup> Monzr M. Al Malki,<sup>1</sup> Matthew Mei,<sup>1</sup> Amandeep Salhotra,<sup>1</sup> Samer Khaled,<sup>1</sup> Ryotaro Nakamura,<sup>1</sup> David Snyder,<sup>1</sup> Margaret O'Donnell,<sup>1</sup> Anthony S. Stein,<sup>1</sup> Stephen J. Forman,<sup>1</sup> Guido Marcucci<sup>1</sup> and Vinod Pullarkat<sup>1</sup>*

*<sup>1</sup>Department of Hematology and Hematopoietic Cell Transplantation, Gehr Family Center for Leukemia Research and <sup>2</sup>Department of Information Sciences, Division of Biostatistics, City of Hope, Duarte, CA, USA*

*Correspondence: [vpullarkat@coh.org](mailto:vpullarkat@coh.org)  
doi:10.3324/haematol.2018.188094*

|       | AGE | DISEASE         | PRIOR ALLO HCT | PRIOR HMA | BEST RESPONSE   | CYTOGENETICS                                                                                                                                               | MUTATION PROFILE                 |
|-------|-----|-----------------|----------------|-----------|-----------------|------------------------------------------------------------------------------------------------------------------------------------------------------------|----------------------------------|
| AML01 | 78  | De novo         | YES            | NO        | CR              | 46,XY,del(17)(q23)                                                                                                                                         | PHF6                             |
| AML02 | 76  | de novo         | NO             | YES       | CR              | 46,XY                                                                                                                                                      | CEBPA, ZRSR2, TET2               |
| AML03 | 76  | de novo         | NO             | YES       | CR              | 48,XY,+19,+21                                                                                                                                              | RUNX1, SETBP1, SRSF2             |
| AML04 | 62  | de novo         | YES            | YES       | CR              | 46,XX,del(7)(q22q36)                                                                                                                                       | DNMT31, IDH1                     |
| AML05 | 60  | de novo         | YES            | NO        | CR              | 46,XY,t(2;12)(p13;p13)                                                                                                                                     | BCOR, DNMT3A, IDH2, STAG2        |
| AML06 | 63  | de novo         | NO             | NO        | CRi             | 47,XX,+i(13)(q10)                                                                                                                                          | DNMT3A, EZH2, FLT3-TKD           |
| AML07 | 69  | de novo         | NO             | NO        | CRi             | 46,XX                                                                                                                                                      | DNMT3A, SRSF2, TET2, TP53, RUNX1 |
| AML08 | 66  | Therapy-related | NO             | NO        | CRi             | 46,XY,del(5)(q13q33),del(7)(p11p13),add(8)(q24),del(12)(p11),del(12)(p11),del(16)(q12q24)                                                                  | TET2, TP53                       |
| AML09 | 43  | De novo         | YES            | YES       | CR              | 46,XX                                                                                                                                                      | NEGATIVE                         |
| AML10 | 62  | De novo         | NO             | NO        | MFLS            | 43,XX,add(1)(p22),der(2)t(2;17)(q33;q21),der(5)t(1;5)(p32;q15),der(6)t(2;6)(q33;p23),der(15;20)t(15;20)(p11;q13)ins(20;21)(q13;q22)dup(21)(q22q21),-17,-21 | BCOR, TP53                       |
| AML11 | 19  | De novo         | NO             | YES       | CR              | 46,XX,t(6;9)(p22;q34)                                                                                                                                      | DEK-NUP214, IDH2, PTPN11         |
| AML12 | 54  | Secondary       | YES            | YES       | MFLS            | 47,XX,t(3;7)(q21;q31),del(17)(p11),+21                                                                                                                     | CSF3R                            |
| AML13 | 63  | Therapy-related | NO             | NO        | Refractory      | 46,XX,t(4;17)(q21;p13),t(9;11)(p22;q23)                                                                                                                    | GATA2, FLT3-ITD                  |
| AML14 | 58  | de novo         | YES            | YES       | Refractory      | 46,XY,i(17)(q10)                                                                                                                                           | CEBPA, CSF3R and GATA2 by NGS    |
| AML15 | 53  | de novo         | YES            | YES       | Refractory      | 46,XX,del(11)(q23q25)                                                                                                                                      | FLT3-ITD                         |
| AML16 | 58  | de novo         | YES            | NO        | Refractory      | 46,XY                                                                                                                                                      | DNMT3A, FLT3-ITD, NPM1           |
| AML17 | 55  | Therapy-related | NO             | NO        | Refractory (PR) | 45,xx,-7                                                                                                                                                   | PTPN11, KRAS                     |
| AML18 | 19  | De novo         | NO             | NO        | Refractory      | 46,XY,t(11;17)(q23;q21) with MLL translocation                                                                                                             | KMT2A-MLLT6, U2AF1               |
