# Supplementary material
Source: PubMed Central journal article supplement (PMC6119155)
Supplement: 2018_188094-Disclosures_and_Contributions.pdf [file 2018_188094-Disclosures_and_Contributions.pdf]

Haematologica  
HAEMATOL/2018/188094  
Version 3

Efficacy of the combination of venetoclax and hypomethylating agents  
in relapsed/refractory acute myeloid leukemia

Ibrahim Aldoss, Dongyun Yang, Ahmed Aribi, Haris Ali, Karamjeet Sandhu, Monzr M. Al Malki, Mathew Mei, Amandeep Salhotra, Samer Khaled, Ryotaro Nakamura, David Snyder, Margaret O'Donnell, Anthony A. Stein, Stephen J. Forman, Guido Marcucci, and Vinod Pullarkat

Disclosures: The authors have no relevant conflicts of interest to disclose

Contributions: IA and VP developed study concept, collected data and wrote the manuscript. DY performed statistical analysis. GM assisted with data interpretation. The remaining authors provided intellectual input and contributed to revision of the draft manuscript.
